# Supplementary material
Source: publisher site journal article supplement (https://www.spandidos-publications.com/5882/downloadSupplementary)
Supplement: Supplementary file 1 [file downloadSupplementary]

Table SI. Olaparib-induced growth inhibition.

| A, MIA Paca-2     |                            |
|-------------------|----------------------------|
| Transduced cells  | IC <sub>50</sub> , $\mu$ M |
| Scrambled control | 9.16 $\pm$ 0.14            |
| M c1              | 9.39 $\pm$ 0.85            |
| M c2              | 9.60 $\pm$ 1.53            |
| B, PANC-1         |                            |
| Transduced cells  | IC <sub>50</sub> , $\mu$ M |
| Scrambled control | 5.33 $\pm$ 2.60            |
| P c1              | 4.34 $\pm$ 0.43            |
| P c2              | 5.71 $\pm$ 2.25            |

Values are expressed as the mean  $\pm$  standard deviation from three independent experiments.
